# Supplementary material
Source: publisher figshare collection journal article supplement (https://springernature.figshare.com/ndownloader/files/23896957)
Supplement: Supplementary file 1 [file 23896957]

Table S1. Composition of TMRL Enrichment Medium for the cultivation of microalgae (AQUACOPs 1984).

| **Constituents** | **Amount** | **Distilled water (D.W.)** |
| --- | --- | --- |
| KNO3 | 100 g | 1000 mL |
| Na2HPO4.12H2O | 10 g | 1000 mL |
| FeCl3.6H2O | 3 g | 1000 mL |
| Na2SiO3. 9H2O | 1 g | 1000 mL |

Table S2. Preparation of AgNPs-MCEs co-application ratio for antimicrobial activity (500 µg/mL)

| Ratio | AgNPs  (Stock 10 mg/mL | MCEs  (Stock 10 mg/mL) | D.W. | Total volume |
| --- | --- | --- | --- | --- |
| 1.5:1 | 45 µL | 30 µL | 1,425 µL | 1500 µL |
| 2:1 | 50 µL | 25 µL | 1,425 µL | 1500 µL |
|  |  |  |  |  |

Table S3. The HPTLC parameters of MCEs-CHL for Retention factor (*Rf*), Area (%) under the curve and Area of Standards (EPA and β-Carotene).

| Track | Start  *Rf* | Start  height (AU) | Max  *Rf* | Max  Height (AU) | Max  Height (%) | End  *Rf* | End  height (AU) | Area  (AU) | Area (%) | Assigned  substance |
| --- | --- | --- | --- | --- | --- | --- | --- | --- | --- | --- |
| EPA | 0.49 | 2.5 | 0.64 | 111.7 | 35.28 | 0.73 | 34.7 | 9042.3 | 41.59 | EPA |
| β-Carotene | 0.74 | 90.4 | 0.78 | 258.0 | 23.09 | 0.84 | 67.4 | 9904.6 | 26.67 | β-Carotene |
| *N. oculata* | 0.53 | 60.7 | 0.59 | 199.5 | 14.70 | 0.68 | 64.9 | 11231.6 | 22.69 | EPA |
| 0.68 | 65.0 | 0.75 | 181.6 | 13.38 | 0.91 | 37.2 | 13994.8 | 28.27 | β-Carotene |
| *T. suecica* | 0.54 | 36.2 | 0.60 | 102.6 | 8.61 | 0.69 | 26.6 | 6216.7 | 15.66 | EPA |
| 0.72 | 46.0 | 0.78 | 130.9 | 10.98 | 0.83 | 72.1 | 5965.6 | 15.03 | β-Carotene |
| *Chlorella* sp. | 0.54 | 4.2 | 0.61 | 77.9 | 6.04 | 0.69 | 25.7 | 4084.9 | 10.76 | EPA |
| 0.69 | 25.8 | 0.77 | 114.7 | 8.89 | 0.83 | 58.0 | 5961.8 | 15.71 | β-Carotene |
| EPA | 0.52 | 4.5 | 0.61 | 81.7 | 33.70 | 0.71 | 20.6 | 5386.3 | 36.45 | EPA |
| β-Carotene | 0.73 | 47.9 | 0.78 | 160.5 | 20.54 | 0.96 | 31.5 | 9527.9 | 37.01 | β-Carotene |

Table S4. The HPTLC parameters of MCEs-HEX for Retention factor (*Rf*), Area (%) under the curve and Area of Standards (EPA and β-Carotene)

| Track | Start  *Rf* | Start  height (AU) | Max  *Rf* | Max  height (AU) | Max  height (%) | End  *Rf* | End  height (AU) | Area  (AU) | Area (%) | Assigned  substance |
| --- | --- | --- | --- | --- | --- | --- | --- | --- | --- | --- |
| EPA | 0.38 | 8.1 | 0.55 | 161.0 AU | 40.42% | 0.65 | 19.0 | 14933.4 | 67.78 | EPA |
| β-Carotene | 0.68 | 20.2 | 0.74 | 52.0 AU | 6.86% | 0.77 | 36.1 | 2044.9 | 11.74 | β-Carotene |
| *N. oculata* | 0.42 | 8.7 | 0.48 | 61.5 | 11.81 | 0.56 | 15.8 | 3077.2 | 21.04 | EPA |
| 0.65 | 21.3 | 0.72 | 66.4 | 12.74 | 0.75 | 50.6 | 2919.3 | 19.96 | β-Carotene |
| *T. suecica* | 0.36 | 39.4 | 0.44 | 141.8 | 14.58 | 0.57 | 25.9 | 11145.2 | 26.73 | EPA |
| 0.57 | 25.9 | 0.71 | 173.0 | 17.79 | 0.85 | 29.9 | 12384.4 | 29.71 | β-Carotene |
| *Chlorella* sp. | 0.41 | 1.0 | 0.49 | 41.3 | 14.55 | 0.60 | 7.5 | 2507.7 | 21.02 | EPA |
| 0.63 | 10.3 | 0.72 | 67.1 | 23.67 | 0.88 | 23.0 | 5434.6 | 15.56 | β-Carotene |
| EPA | 0.38 | 1.9 | 0.50 | 83.2 | 41.25 | 0.63 | 11.7 | 7061.5 | 65.10 | EPA |
| β-Carotene | 0.69 | 27.7 | 0.74 | 48.8 | 7.82 | 0.88 | 18.1 | 3884.1 | 25.23 | β-Carotene |

Table S5.The HPTLC parameters of MCEs-ETH for Retention factor (*Rf*), Area (%) under the curve and Area of Standards (EPA and β-Carotene).

| Track | Start  *Rf* | Start  height (AU) | Max  *Rf* | Max  Height (AU) | Max  height (%) | End  *Rf* | End  height (AU) | Area  (AU) | Area (%) | Assigned  substance |
| --- | --- | --- | --- | --- | --- | --- | --- | --- | --- | --- |
| EPA | 0.47 | 4.4 | 0.62 | 152.4 | 52.09 | 0.70 | 20.9 | 10787.2 | 73.79 | EPA |
| β-Carotene | 0.69 | 143.8 | 0.73 | 504.1 | 35.61 | 0.79 | 15.1 | 14356.3 | 33.49 | β-Carotene |
| *N. oculata* | 0.45 | 39.2 | 0.59 | 229.5 | 12.31 | 0.67 | 93.5 | 16463.2 | 25.02 | EPA |
| 0.69 | 80.9 | 0.74 | 189.5 | 10.16 | 0.82 | 6.8 | 6966.3 | 10.59 | β-Carotene |
| *T. suecica* | 0.58 | 159.7 | 0.60 | 165.1 | 9.00 | 0.66 | 68.7 | 6319.7 | 11.46 | EPA |
| 0.67 | 67.9 | 0.73 | 160.0 | 8.72 | 0.82 | 1.6 | 6862.3 | 12.45 | β-Carotene |
| *Chlorella* sp. | 0.60 | 136.4 | 0.63 | 158.0 | 10.15 | 0.69 | 66.9 | 7345.2 | 14.86 | EPA |
| 0.69 | 67.1 | 0.73 | 256.4 | 16.46 | 0.81 | 5.6 | 8008.8 | 16.20 | β-Carotene |
| EPA | 0.42 | 1.3 | 0.62 | 119.3 | 60.26 | 0.69 | 17.3 | 9064.6 | 75.43 | EPA |
| β-Carotene | 0.68 | 116.4 | 0.72 | 315.6 | 30.83 | 0.79 | 10.1 | 9793.7 | 33.24 | β-Carotene |

Table S6. Inhibitory effects (mm) of AgNPs and MCEs (500 µg/mL) single application and standard antibiotic penicillin on selected microorganisms for 24 h by using well diffusion methods. The results are expressed as the Means ± SD of three replicates.

| **Bacteria / Antimicrobial agents** | ***N. oculata*** | | | | | ***T. suecica*** | | | | | ***Chlorella* sp.** | | | | | **AgNPs** | **PC** |
| --- | --- | --- | --- | --- | --- | --- | --- | --- | --- | --- | --- | --- | --- | --- | --- | --- | --- |
| Methanol | Chloroform | Hexane | Ethanol | Water | Methanol | Chloroform | Hexane | Ethanol | Water | Methanol | Chloroform | Hexane | Ethanol | Water |
| **Gram positive**  **1- *B. subtilis*** | 14  ±  0.1 | 14  ±  0.03 | 13  ±  0.03 | 8  ±  0.1 | 11  ±  0.8 | - | 13  ±  0.03 | 11  ±  0.03 | 10  ±  0.03 | 10  ±  0.03 | - | - | 10  ±  0.03 | 10  ±  0.03 | 10  ±  0.00 | 19  ±  0.03 | 11  ±  0.03 |
| **2- *S. uberis*** | 12  ±  0.08 | 15  ±  0.03 | 14  ±  0.06 | 6  ±  0.00 | 11  ±  0.07 | - | - | - | 6  ±  0.00 | 10  ±  0.03 | - | 15  ±  0.06 | 11  ±  0.06 | - | 10  ±  0.07 | 19  ±  0.03 | 10  ±  0.03 |
| **Gram negative**  **1- *Salmonella* sp.** | 11  ±  0.03 | 12  ±  0.03 | 11  ±  0.09 | 10  ±  0.03 | 8  ±  0.03 | - | - | 11  ±  0.03 | 10  ±  0.03 | 8  ±  0.03 | 14  ±  0.03 | 11  ±  0.03 | - | 6  ±  0.00 | 9  ±  0.03 | 18  ±  0.03 | 11  ±  0.03 |
| **2- *K. pneumoniae*** | - | 15  ±  0.06 | 12  ±  0.03 | 11  ±  0.03 | 11  ±  0.03 | 12  ±  0.03 | 15  ±  0.06 | 13  ±  0.07 | - | 11  ±  0.03 | 13  ±  0.03 | 11  ±  0.07 | 11  ±  0.07 | - | 10  ±  0.08 | 23  ±  0.1 | - |

A symbol “-“meansno activity..

Table S7. Inhibitory effects (mm) of AgNPs and MCEs (500 µg/mL) co-application at the 1.5:1 and 2:1 ratios on selected microorganisms for 24 h by using well diffusion methods. The results are expressed as the Means ± SD of three replicates.

| **Bacteria / Antimicrobial agents** |  | | | | | **AgNPs- MCEs (1.5:1 ratio)** | | | | |  | | | | | |
| --- | --- | --- | --- | --- | --- | --- | --- | --- | --- | --- | --- | --- | --- | --- | --- | --- |
| ***N. oculata*** | | | | | ***T. suecica*** | | | | | ***Chlorella* sp.** | | | | | |
| Methanol | Chloroform | Hexane | Ethanol | Water | Methanol | Chloroform | Hexane | Ethanol | Water | Methanol | Chloroform | Hexane | Ethanol | Water |
| **Gram positive**  **1- *B. subtilis*** | 10  ±  0.03 | 11  ±  0.06 | 10  ±  0.06 | 10  ±  0.05 | 12  ±  0.03 | 16  ±  0.03 | 12  ±  0.03 | 16  ±  0.03 | 11  ±  0.03 | 12  ±  0.03 | 16  ±  0.03 | 12  ±  0.03 | 15  ±  0.03 | 10  ±  0.03 | 12  ±  0.03 |
| **2- *S. uberis*** | 9  ±  0.03 | 11  ±  0.03 | 10  ±  0.03 | 10  ±  0.03 | 12  ±  0.03 | 15  ±  0.03 | 15  ±  0.03 | 14  ±  0.03 | 10  ±  0.03 | 12  ±  0.1 | 15  ±  0.03 | 14  ±  0.03 | 13  ±  0.06 | 11  ±  0.03 | 13  ±  0.03 |
| **Gram negative**  **1- *Salmonella* sp.** | 16  ±  0.06 | 11  ±  0.03 | 9  ±  0.03 | 12  ±  0.06 | 11  ±  0.06 | 16  ±  0.03 | 11  ±  0.03 | 14  ±  0.03 | 12  ±  0.03 | 10  ±  0.00 | 15  ±  0.03 | 14  ±  0.03 | 15  ±  0.03 | 12  ±  0.03 | 10  ±  0.03 |
| **2- *K. pneumoniae*** | 7  ±  0.09 | 11  ±  0.03 | 10  ±  0.09 | 8  ±  0.03 | 15  ±  0.1 | 10  ±  0.03 | 12  ±  0.06 | 15  ±  0.03 | 8  ±  0.03 | 12  ±  0.03 | 14  ±  0.03 | 10  ±  0.03 | 13  ±  0.09 | 9  ±  0.03 | 12  ±  0.03 |
| **AgNPs-MCEs (2:1 ratio)** | | | | | | | | | | | | | | | |
| **Gram positive**  **1- *B. subtilis*** | 15  ±  0.03 | 12  ±  0.03 | 15  ±  0.03 | 11  ±  0.03 | 13  ±  0.05 | 13  ±  0.03 | 10  ±  0.03 | 12  ±  0.09 | 10  ±  0.03 | 11  ±  0.03 | 15  ±  0.03 | 11  ±  0.03 | 15  ±  0.00 | 11  ±  0.03 | 13  ±  0.03 |
| **2- *S. uberis*** | 14  ±  0.03 | 13  ±  0.03 | 14  ±  0.03 | 11  ±  0.03 | 12  ±  0.03 | 10  ±  0.03 | 10  ±  0.03 | 11  ±  0.03 | 10  ±  0.00 | 12  ±  0.03 | 14  ±  0.03 | 11  ±  0.06 | 14  ±  0.2 | 11  ±  0.03 | 13  ±  0.03 |
| **Gram negative**  **1- *Salmonella* sp.** | 14  ±  0.03 | 12  ±  0.03 | 14  ±  0.03 | 12  ±  0.03 | 10  ±  0.03 | 14  ±  0.07 | 10  ±  0.03 | 12  ±  0.03 | 14  ±  0.03 | 10  ±  0.03 | 14  ±  0.03 | 10  ±  0.03 | 13  ±  0.03 | 13  ±  0.03 | 11  ±  0.05 |
| **2- *K. pneumoniae*** | 11  ±  0.06 | 11  ±  0.03 | 11  ±  0.03 | 14  ±  0.1 | 13  ±  0.1 | 8  ±  0.06 | 8  ±  0.03 | 7  ±  0.09 | 12  ±  0.00 | 8  ±  0.03 | 10  ±  0.03 | 9  ±  0.07 | 11  ±  0.06 | 14  ±  0.03 | 12  ±  0.03 |

Table S8. Minimum inhibitory concentration (MIC, µg/mL) of MCEs and AgNPs single application by using the microtiter plate dilution method

| **Bacteria / Antimicrobial agents** | ***N. oculata*** | | | | | ***T. suecica*** | | | | | ***Chlorella* sp.** | | | | | **AgNPs** | **PC** |
| --- | --- | --- | --- | --- | --- | --- | --- | --- | --- | --- | --- | --- | --- | --- | --- | --- | --- |
| Methanol | Chloroform | Hexane | Ethanol | Water | Methanol | Chloroform | Hexane | Ethanol | Water | Methanol | Chloroform | Hexane | Ethanol | Water |
| **Gram positive**  **1- *B. subtilis*** | 62.5 | 62.5 | 62.5 | 125 | 62.5 | - | 62.5 | 62.5 | 125 | 125 | - | - | 125 | 125 | 125 | 31.25 | 125 |
| **2- *S. uberis*** | 62.5 | 62.5 | 62.5 | 125 | 62.5 | - | - | - | 125 | 125 | - | 62.5 | 125 | - | 125 | 31.25 | 125 |
| **Gram negative**  **1- *Salmonella* sp.** | 62.5 | 62.5 | 62.5 | 125 | 125 | - | - | 125 | 125 | 125 | 62.5 | 125 | - | 125 | 125 | 31.25 | 62.5 |
| **2- *K. pneumoniae*** | - | 62.5 | 62.5 | 125 | 125 | 62.5 | 62.56 | 62.5 | - | 62.5 | 62.5 | 125 | 62.5 | - | 125 | 15.625 | - |

| **Bacteria / Antimicrobial agents** |  | | | | | | **AgNPs- MCEs (1.5:1 ratio)** | | | | | |  | | | | | |
| --- | --- | --- | --- | --- | --- | --- | --- | --- | --- | --- | --- | --- | --- | --- | --- | --- | --- | --- |
| ***N. oculata*** | | | | | | ***T. suecica*** | | | | | | ***Chlorella* sp.** | | | | | |
| Methanol | Chloroform | Hexane | Ethanol | Water | Methanol | | Chloroform | Hexane | Ethanol | Water | Methanol | | Chloroform | Hexane | Ethanol | Water |
| **Gram positive**  **1- *B. subtilis*** | 62.5 | 62.5 | 125 | 125 | 62.5 | 31.25 | | 62.5 | 31.25 | 62.5 | 62.5 | 31.25 | | 62.5 | 31.25 | 125 | 62.5 |
| **2- *S. uberis*** | 125 | 62.5 | 62.5 | 125 | 62.5 | 31.25 | | 31.25 | 31.25 | 125 | 62.5 | 31.25 | | 62.5 | 62.5 | 62.5 | 62.5 |
| **Gram negative**  **1- *Salmonella* sp.** | 31.25 | 62.5 | 125 | 62.5 | 62.5 | 31.25 | | 62.5 | 31.25 | 62.5 | 125 | 31.25 | | 62.5 | 31.25 | 62.5 | 125 |
| **2- *K. pneumoniae*** | 125 | 62.5 | 125 | 125 | 31.25 | 62.5 | | 62.5 | 31.25 | 125 | 62.5 | 31.25 | | 62.5 | 62.5 | 125 | 62.5 |
| **AgNPs- MCEs (2:1 ratio)** | | | | | | | | | | | | | | | | | | |
| **Gram positive**  **1- *B. subtilis*** | 31.25 | 62.5 | 31.25 | 62.5 | 31.25 | 62.5 | | 62.5 | 62.5 | 62.5 | 62.5 | 31.25 | | 62.5 | 31.25 | 62.5 | 62.5 |
| **2- *S. uberis*** | 31.25 | 62.5 | 31.25 | 62.5 | 62.5 | 62.5 | | 62.5 | 62.5 | 125 | 62.5 | 31.25 | | 62.5 | 31.25 | 62.5 | 31.25 |
| **Gram negative**  **1- *Salmonella* sp.** | 31.25 | 62.5 | 31.25 | 62.5 | 125 | 31.25 | | 62.5 | 62.5 | 31.25 | 62.5 | 31.25 | | 62.5 | 31.25 | 62.5 | 62.5 |
| **2- *K. pneumoniae*** | 62.5 | 62.5 | 62.5 | 31.25 | 62.5 | 125 | | 125 | 125 | 62.5 | 125 | 125 | | 125 | 62.5 | 31.25 | 62.5 |

Table S9. Minimum inhibitory concentration (MIC, µg/mL) of AgNPs and MCEs co-application at the 1.5:1 and 2:1 ratios by using the microtiter plate dilution method.





**Figure S1**





**Figure S2**





**Figure S3**





**Figure S4**


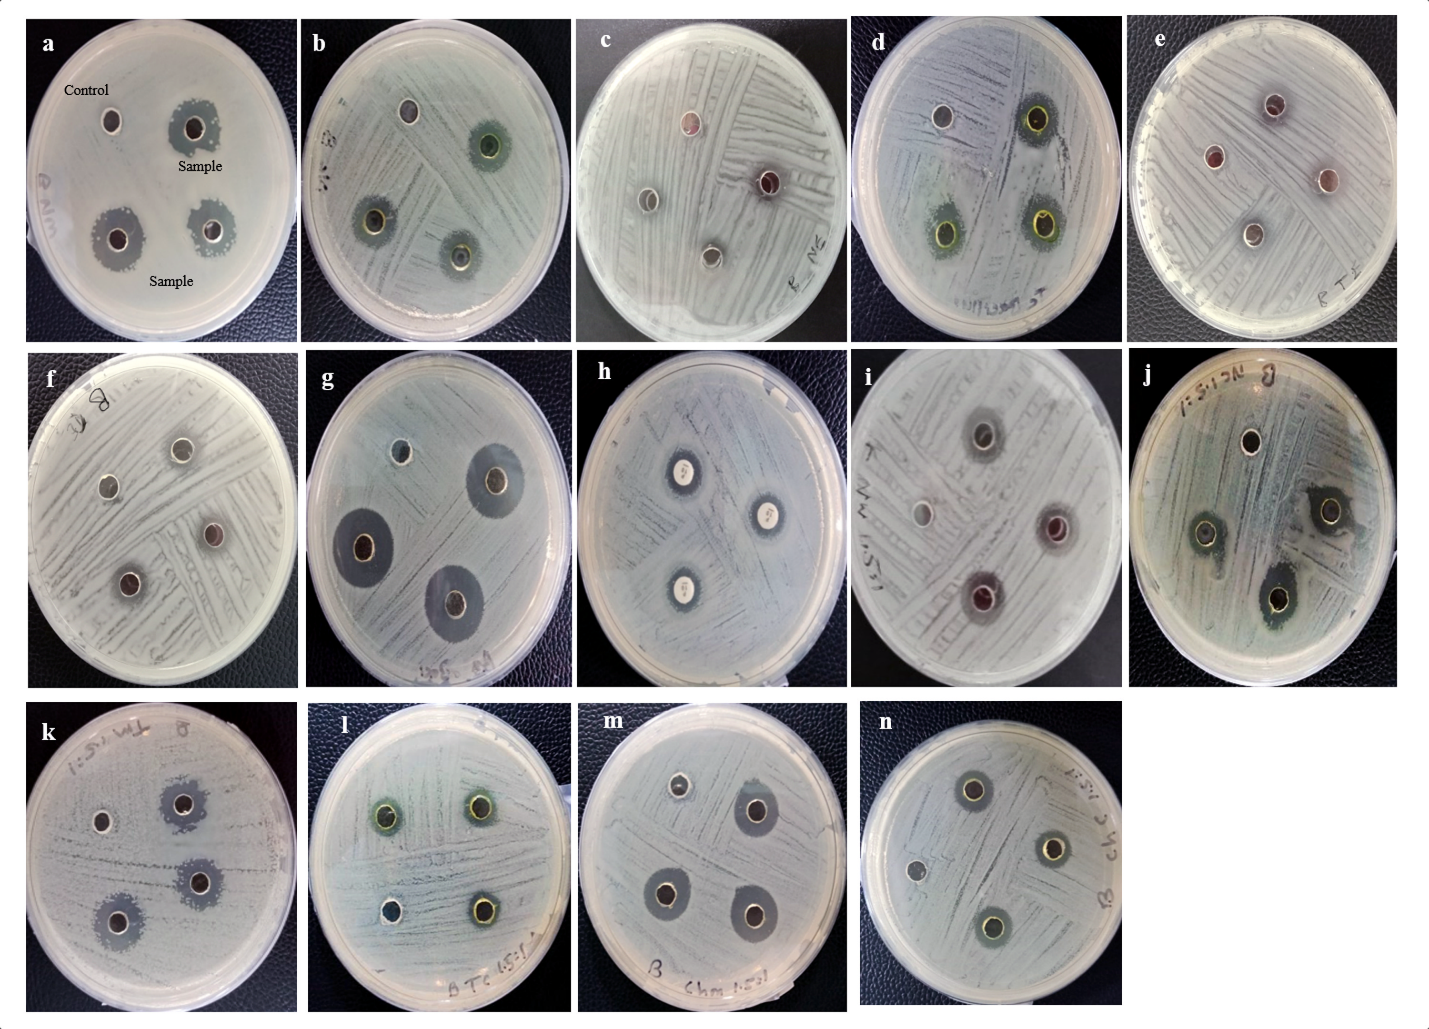


**Figure S5**


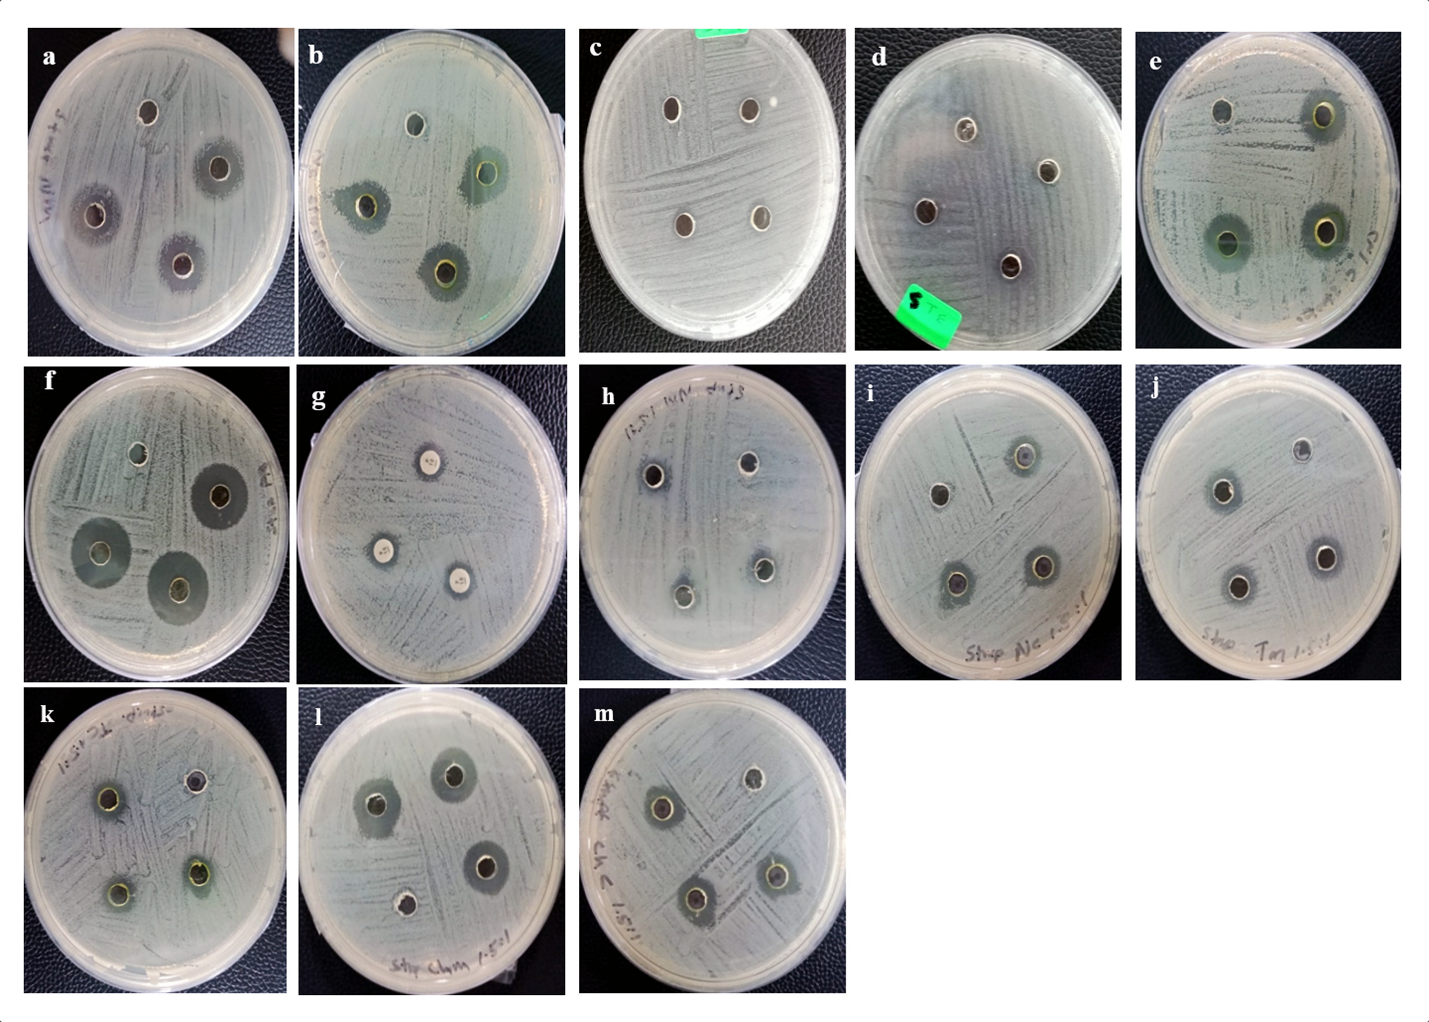


**Figure S6**

**
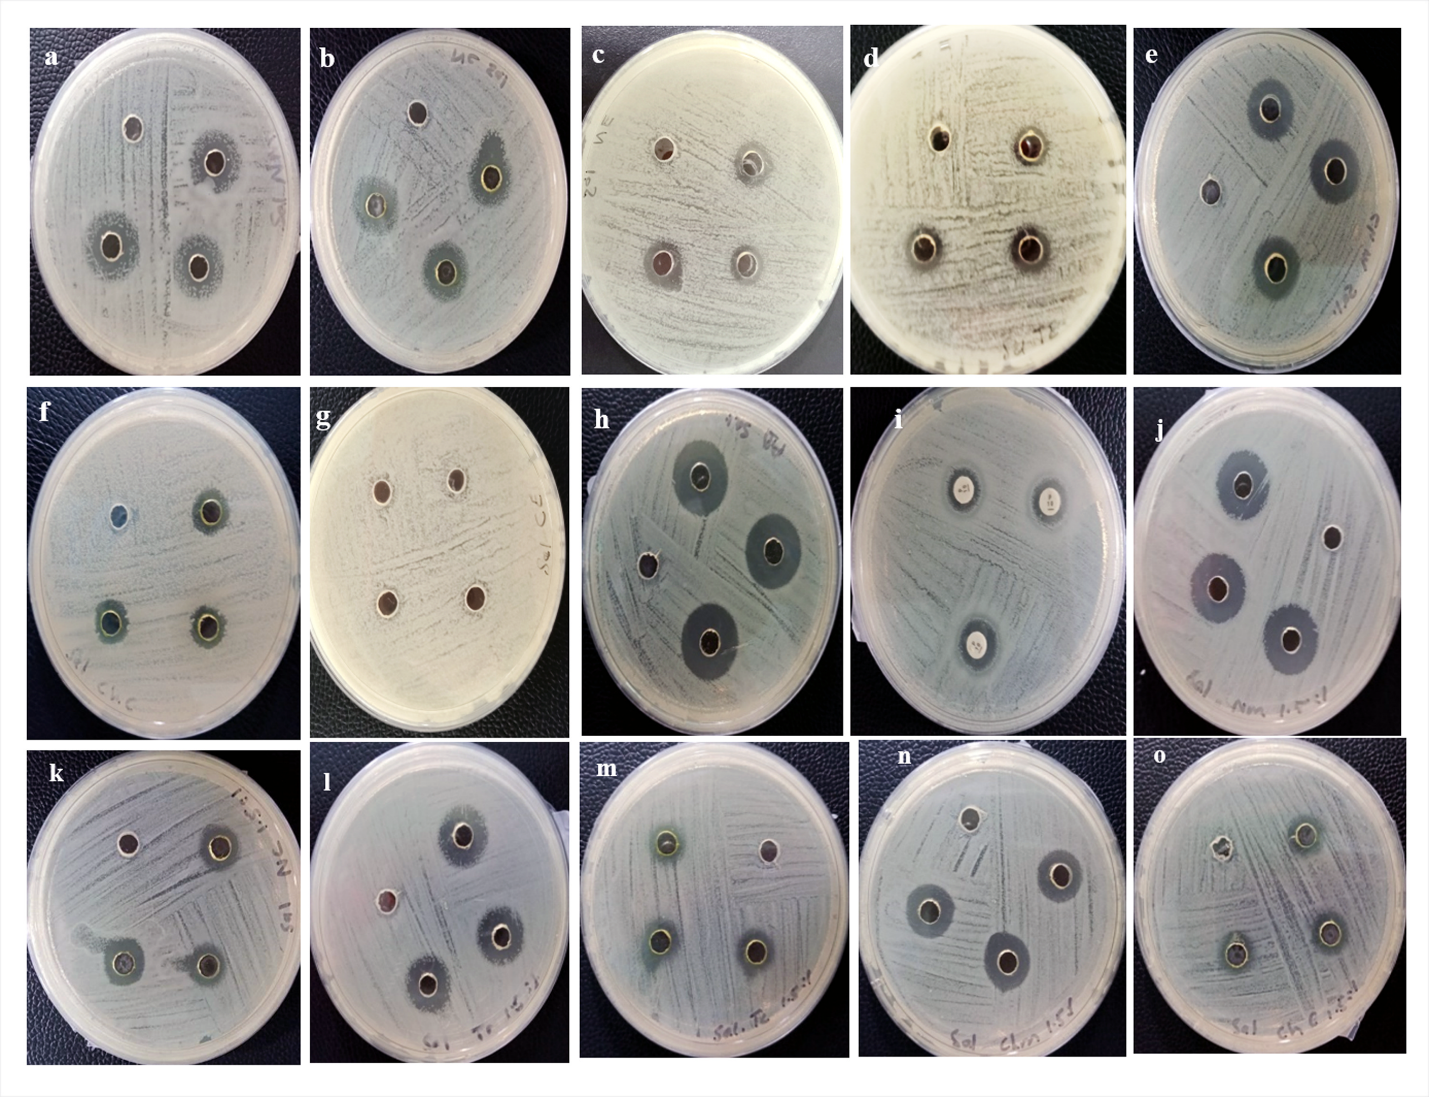
**

**Figure S7**


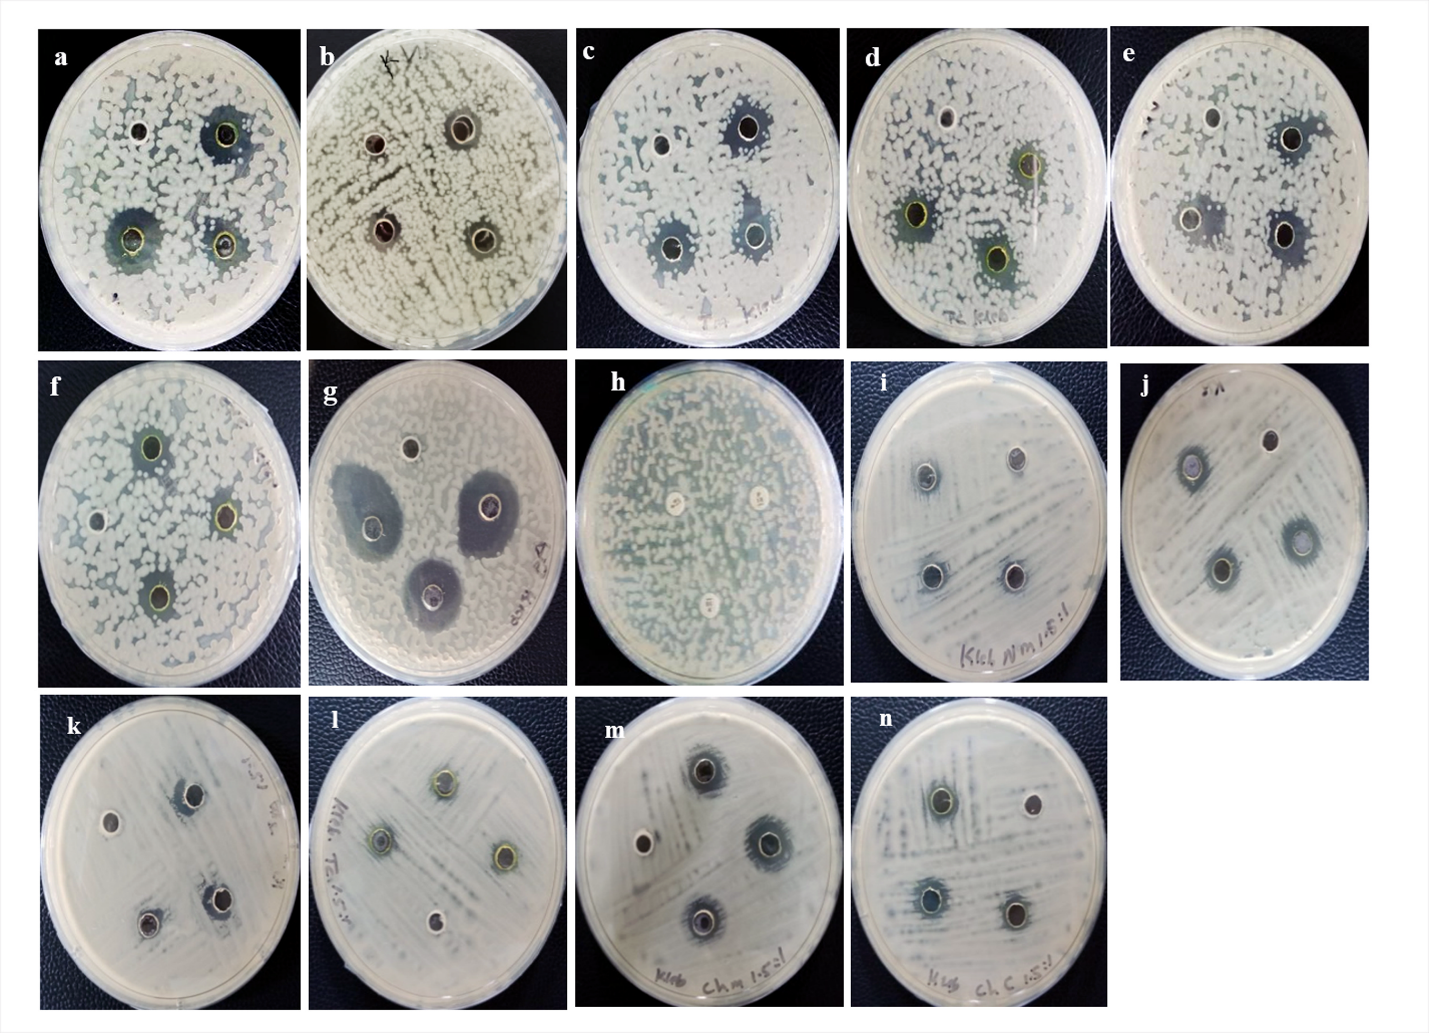


**Figure S8**
